# Supplementary material
Source: HighWire-hosted journal article supplement (https://dmd.aspetjournals.org/highwire/filestream/76940/field_highwire_adjunct_files/0/000227R2_Supplemental_PDF.pdf)
Supplement: 000227R2_Supplemental_PDF.pdf [file 000227R2_Supplemental_PDF.pdf]

## Sheet: P
p	Name	Value	Unit	Fix/Opt	LB	UB	Description
p[0]	ini_t	0	min	Fix	0	0	start time of simulation
p[1]	end_t	480	min	Fix	0	0	end time of simulation
p[2]	one_time	1000000	min	Fix	0	0	interval (never again)
p[3]	endless	1000000	min	Fix	0	0	duration (endless)
p[4]	no_duration	1e-06	min	Fix	0	0	duration (instant)
p[5]	no_lag_time	0	min	Fix	0	0	lag time (no lag from start)
p[6]	V_cent	63386.7	mL	Opt	2000	200000	volume of central compartment
p[7]	tau_hb	0.125	min	Fix	0	0	interval of blood flow
p[8]	V_hb	181.25	mL	Fix	0	0	hepatic blood volume
p[9]	Q_hb	1450	mL/min	Fix	0	0	blood flow rate
p[10]	fu_b	0.2365	-	Fix	0	0	fraction unbound in blood
p[11]	CLint_h	165668	mL/min	Opt	2000	200000	intrinsic clearanse
p[12]	k_c2d1	0.276308	min-1	Opt	0.05	5	distribution rate constant
p[13]	k_d2c1	0.144548	min-1	Opt	0.05	5	distribution rate constant
p[14]	k_c2d2	0.0476947	min-1	Opt	0.0005	0.05	distribution rate constant
p[15]	k_d2c2	0.0128739	min-1	Opt	0.0005	0.05	distribution rate constant
p[16]	MW	259.34	g/mol	Fix	0	0	molecular weight
p[17]	DosePerKg	50000	ng/kg	Fix	0	0	dosing amount
p[18]	BW	70	kg	Fix	0	0	body weight
p[19]	DummyParam	0	-	Fix	0	0	Ht = 0.45

## Sheet: Y
y	Name	y0	Unit	ODE	Description
y[0]	C_cent	0	nmol/mL	dydt[0] = 1/V_cent*(k_d2c1*X_dstr1 - k_c2d1*C_cent*V_cent + k_d2c2*X_dstr2 - k_c2d2*C_cent*V_cent)
y[1]	C_hb	0	nmol/mL	dydt[1] = 1/V_hb * (-fu_b*CLint_h*C_hb)
y[2]	X_dstr1	0	nmol/mL	dydt[2] = -k_d2c1*X_dstr1 + k_c2d1*C_cent*V_cent
y[3]	X_dstr2	0	nmol/mL	dydt[3] = -k_d2c2*X_dstr2 + k_c2d2*C_cent*V_cent

## Sheet: B
Beat	Interval	Lag	Duration	Description
0	one_time	no_lag_time	no_duration	Dose
1	tau_hb	no_lag_time	endless	blood flow

## Sheet: R
Beat	PRE	Sort	Description
0	delta_C_cent += DosePerKg * BW / MW / V_cent
1	delta_C_cent += V_hb/V_cent*(C_hb - C_cent)
1	delta_C_hb += -C_hb + C_cent

## Sheet: N
CRE	Sort	Description
DummyParam = 0		for using self-made solver

## Sheet: D
d	t	y	t_sd	y_sd	y_idx	c_idx	s_idx	Description
d[0]	1	0.154036			0
d[1]	2	0.116019			0
d[2]	5	0.0684918			0
d[3]	10	0.0488136			0
d[4]	20	0.0415537			0
d[5]	30	0.035553			0
d[6]	60	0.023515			0
d[7]	120	0.0184309			0
d[8]	180	0.0131402			0
d[9]	240	0.0114775			0
d[10]	360	0.0059937			0
d[11]	480	0.0040157			0

## Sheet: M
Memo
